# Supplementary material for: Improved Spectral Detection of Nitrogen Deficiency and Yellow Mosaic Disease Stresses in Wheat Using a Soil Effect Removal Algorithm and Machine Learning
Source: MDPI journal article supplement (doi:10.3390/rs15102513), 2023-05-10
Supplement: s1 [file s1]

# Spectral indices (SIs) included in this study and their formulations

| Type        | Index                                                    | Short  | Formulation                                                                          | Reference                                             |
|-------------|----------------------------------------------------------|--------|--------------------------------------------------------------------------------------|-------------------------------------------------------|
| Chlorophyll | Reciprocal Reflectance                                   | RR     | $1/R_{700}$                                                                          | Gitelson et al. (1999)                                |
|             | Modified Red-edge Ratio                                  | MSR    | $(R_{750}-R_{445})/(R_{705}-R_{445})$                                                | Sims and Gamon (2002)                                 |
|             | Pigment Specific Simple Ratio                            | PSSRa  | $R_{800}/R_{675}$                                                                    | Blackburn (1998b)                                     |
|             |                                                          | PSSRb  | $R_{800}/R_{650}$                                                                    | Blackburn (1999)                                      |
|             | Ratio Analysis of Reflectance Spectra                    | RARSa  | $R_{675}/R_{700}$                                                                    | Chappelle et al. (1992)                               |
|             |                                                          | RARSb  | $R_{675}/(R_{675} \times R_{700})$                                                   | Chappelle et al. (1992)                               |
|             | Red-edge NDVI                                            | mNDVI  | $(R_{750}-R_{705})/(R_{750}+R_{705})$                                                | Gitelson and Merzlyak (1994)<br>Sims and Gamon (2002) |
|             | Modified Red-edge Normalized Difference Vegetation Index | mNDI   | $(R_{750}-R_{705})/(R_{750}-R_{705}-2R_{445})$                                       | Sims and Gamon (2002)                                 |
|             | Green NDVI                                               | gNDVI  | $(R_{750}-R_{550})/(R_{750}+R_{550})$                                                | Gitelson and Merzlyak (1996)<br>Datt (1998)           |
|             | Pigment Specific Normalized Difference                   | PSNDa  | $(R_{800}-R_{675})/(R_{800}+R_{675})$                                                | Blackburn (1998a)                                     |
|             |                                                          | PSNDb  | $(R_{800}-R_{650})/(R_{800}+R_{650})$                                                |                                                       |
|             |                                                          | PSNDc  | $(R_{800}-R_{470})/(R_{800}+R_{470})$                                                |                                                       |
|             | Macc01                                                   | Macc01 | $(R_{780}-R_{710})/(R_{780}-R_{680})$                                                | Maccioni et al. (2001)                                |
|             | The MERIS terrestrial chlorophyll ind                    | MTCI   | $(R_{754}-R_{709})/(R_{709}-R_{681})$                                                | Dash and Curran (2004)                                |
|             | DATT                                                     | DATT   | $(R_{850}-R_{710})/(R_{850}-R_{680})$                                                | Datt (1999)                                           |
|             | Modified DATT                                            | MDATT  | $(R_{721}-R_{744})/(R_{721}-R_{714})$                                                | Lu et al. (2018)                                      |
|             | Vogelmann indices                                        | VOG1   | $R_{740}/R_{720}$                                                                    | Vogelmann et al. (1993)                               |
|             |                                                          | VOG2   | $(R_{734}-R_{747})/(R_{715}-R_{726})$                                                |                                                       |
|             |                                                          | VOG3   | $(R_{734}-R_{747})/(R_{715}+R_{720})$                                                |                                                       |
|             | Gitelson & Merzlyak indices                              | GM1    | $R_{750}/R_{550}$                                                                    | Gitelson and Merzlyak (1996)                          |
|             |                                                          | GM2    | $R_{750}/R_{700}$                                                                    |                                                       |
|             | Transformed Chlorophyll Absorption in Reflectance Index  | TCARI  | $3 \times [(R_{700}-R_{670})-0.2 \times (R_{700}-R_{550}) \times (R_{700}/R_{670})]$ | Haboudane et al. (2002)                               |
|             | Chlorophyll Index                                        | CI     | $R_{750}/R_{710}$                                                                    | Haboudane et al.                                      |

|             |                                        |                                  |                                                                           |                                  |
|-------------|----------------------------------------|----------------------------------|---------------------------------------------------------------------------|----------------------------------|
|             | Red Edge                               |                                  |                                                                           | (2002)                           |
|             | Simple Ratio Pigment Index             | SRPI                             | $R_{430}/R_{680}$                                                         | Penuelas et al. (1995)           |
|             | Normalized Pigments Index              | NPCI                             | $(R_{680}-R_{430})/(R_{680}+R_{430})$                                     | Penuelas et al. (1995)           |
|             | Carter indices                         | CTRI1<br>CAR                     | $R_{695}/R_{420}$<br>$R_{695}/R_{760}$                                    | Carter (1994)                    |
|             | Reflectance band ratio indices         | DCabCxc<br>NDIRCabCxc            | $R_{672}/(R_{550} \times 3R_{708})$<br>$R_{860}/(R_{550} \times R_{708})$ | Datt (1998)                      |
|             | Structure-Intensive Pigment Index      | SIPI                             | $(R_{800}-R_{445})/(R_{800}+R_{680})$                                     | Penuelas et al. (1995)           |
|             | Chl <sub>RE opt</sub>                  | ChIRE opt                        | $(1/R_{680-730}-1/R_{780-800}) \times R_{755-780}$                        | Féret et al. (2011)              |
|             | RI <sub>708,775</sub>                  | RI <sub>708,775</sub>            | $R_{708}/R_{775}$                                                         | Féret et al. (2011)              |
|             | ND <sub>780,712</sub>                  | ND <sub>780,712</sub>            | $(R_{780}-R_{712})/(R_{780}+R_{712})$                                     | Féret et al. (2011)              |
|             | Chlorophyll/carotenoid Index           | CCI                              | $(R_{531}-R_{645})/(R_{531}+R_{645})$                                     | Gamon et al. (2016)              |
|             | LAI insensitive chlorophyll index      | LICI                             | $LICI = R_{735}/R_{720} - (R_{573}-R_{680})/(R_{573}+R_{680})$            | Li et al. (2020)                 |
| Carotenoid  | Ratio Analysis of Reflectance Spectra  | RARSc                            | $R_{760}/R_{500}$                                                         | Chappelle et al. (1992)          |
|             | Pigment Specific Simple Ratio          | PSSRc                            | $R_{800}/R_{470}$                                                         | Blackburn (1998a)                |
|             | Photochemical Reflectance Index        | PRI                              | $(R_{531}-R_{570})/(R_{531}+R_{570})$                                     | Gamon et al. (1992)              |
|             |                                        | CRI <sub>550</sub>               | $(1/R_{510})-(1/R_{550})$                                                 |                                  |
|             |                                        | CRI <sub>700</sub>               | $(1/R_{510})-(1/R_{700})$                                                 |                                  |
|             |                                        | CRI <sub>515,550</sub>           | $(1/R_{515})-(1/R_{550})$                                                 |                                  |
|             |                                        | CRI <sub>515,700</sub>           | $(1/R_{515})-(1/R_{700})$                                                 |                                  |
|             | Carotenoid Reflectance Index           | PNIR $\times$ CRI <sub>700</sub> | $(1/R_{510})-(1/R_{550}) \times R_{770}$                                  | Gitelson et al. (2002)           |
|             |                                        | PNIR $\times$ CRI <sub>770</sub> | $(1/R_{510})-(1/R_{700}) \times R_{770}$                                  |                                  |
|             | <i>Car</i> <sub>RE opt</sub>           | <i>Car</i> <sub>RE opt</sub>     | $(1/R_{510-530}-1/R_{680-730}) \times R_{760-780}$                        |                                  |
|             | RI <sub>530,800</sub>                  | RI <sub>530,800</sub>            | $R_{530}/R_{800}$                                                         | Féret et al. (2011)              |
|             | ND <sub>800,530</sub>                  | ND <sub>800,530</sub>            | $(R_{800}-R_{530})/(R_{800}+R_{530})$                                     |                                  |
| Anthocyanin | Anthocyanin Reflectance Index          | ARI                              | $R_{550}^{-1} - R_{700}^{-1}$                                             | Gitelson et al. (2001)           |
|             | Modified Anthocyanin Reflectance Index | mARI                             | $(R_{530-570}^{-1} - R_{690-710}^{-1}) \times R_{NIR}$                    | Gitelson et al. (2006)           |
| Xanthophyll | Photochemical Refl. Index (515)        | PRI <sub>515</sub>               | $(R_{515}-R_{531})/(R_{515}+R_{531})$                                     | Hernandez-Clemente et al. (2011) |

|             |                                         |                         |                                                                    |                                  |
|-------------|-----------------------------------------|-------------------------|--------------------------------------------------------------------|----------------------------------|
|             | Photochemical Refl. Index (512)         | PRI <sub>512</sub>      | $(R_{512}-R_{531})/(R_{512}+R_{531})$                              | Hernandez-Clemente et al. (2011) |
|             | Photochemical Refl. Index (600)         | PRI <sub>600</sub>      | $(R_{600}-R_{531})/(R_{600}+R_{531})$                              | Gamon et al. (1992)              |
|             | Photochemical Refl. Index (670)         | PRI <sub>670</sub>      | $(R_{670}-R_{531})/(R_{670}+R_{531})$                              | Gamon et al. (1992)              |
|             | Photochemical Refl. Index (670 and 570) | PRI <sub>670, 570</sub> | $(R_{570}-R_{531}-R_{670})/(R_{570}+R_{531}+R_{670})$              | Hernandez-Clemente et al. (2011) |
|             | Carotenoid/Chlorophyll Ratio Index      | PRI×CI                  | $(R_{570}-R_{530})/(R_{570}+R_{530}) \times ((R_{760}/R_{700})-1)$ | Garrity et al. (2011)            |
| R/G/B color | Redness Index                           | R                       | $R_{700}/R_{670}$                                                  | Gitelson et al. (2000)           |
|             | Greenness Index                         | G                       | $R_{570}/R_{670}$                                                  | Calderón et al. (2013)           |
|             | Blue Index                              | B                       | $R_{450}/R_{490}$                                                  | Calderón et al. (2013)           |
|             | Blue/green index                        | BGI1                    | $R_{400}/R_{550}$                                                  | Zarco-Tejada et al. (2005)       |
|             | Blue/green index                        | BGI2                    | $R_{450}/R_{550}$                                                  | Zarco-Tejada et al. (2005)       |
|             | Blue/red index                          | BRI1                    | $R_{400}/R_{690}$                                                  | Zarco-Tejada et al. (2012)       |
|             | Blue/red index                          | BRI2                    | $R_{450}/R_{690}$                                                  | Zarco-Tejada et al. (2012)       |
|             | BF1                                     | BF1                     | $R_{400}/R_{410}$                                                  | Zarco-Tejada et al. (2018)       |
|             | BF2                                     | BF2                     | $R_{400}/R_{420}$                                                  | Zarco-Tejada et al. (2018)       |
|             | BF3                                     | BF3                     | $R_{400}/R_{430}$                                                  | Zarco-Tejada et al. (2018)       |
|             | BF4                                     | BF4                     | $R_{400}/R_{440}$                                                  | Zarco-Tejada et al. (2018)       |
|             | BF5                                     | BF5                     | $R_{400}/R_{450}$                                                  | Zarco-Tejada et al. (2018)       |
|             | Red/green index                         | RGI                     | $R_{690}/R_{550}$                                                  | Zarco-Tejada et al. (2005)       |
|             | Ratio Analysis of Reflectance Spectra   | RARS                    | $R_{746}/R_{513}$                                                  | Chappelle et al. (1992)          |
|             | Lichtenthaler Index                     | LIC1                    | $(R_{800}-R_{680})/(R_{800}+R_{680})$                              | Lichtenthaler et al. (1996)      |
|             |                                         | LIC2                    | $R_{440}/R_{690}$                                                  |                                  |
|             |                                         | LIC3                    | $R_{440}/R_{740}$                                                  |                                  |
| Nitrogen    | Optimal vegetation                      | Vi <sub>opt</sub>       | $(1+0.45) \times (R_{800}^2+1)/(R_{670}+0.4$                       | Reyniers et al.                  |

|              |                                        |                     |                                                                                                         |                              |
|--------------|----------------------------------------|---------------------|---------------------------------------------------------------------------------------------------------|------------------------------|
|              | index                                  |                     | 5)                                                                                                      | (2006)                       |
|              | Normalized difference vegetation index | NDVI <sub>g-b</sub> | $(R_{573}-R_{440})/(R_{573}+R_{440})$                                                                   | Hansen & Schjoerring. (2003) |
|              | Ratio vegetation index I               | RVI I               | $R_{810}/R_{660}$                                                                                       | Zhu et al. (2008)            |
|              | Ratio vegetation index II              | RVI II              | $R_{810}/R_{560}$                                                                                       | Xue et al. (2004)            |
|              | Nitrogen reflectance index             | NRI                 | $(R_{570}-R_{670})/(R_{570}+R_{670})$                                                                   | Bausch & Duke. (1996)        |
|              | Combined index                         | MCARI               | $MCARI=[R_{700}-R_{670}-0.2(R_{700}-R_{550})]\times(R_{700}/R_{670})$                                   | Eitel et al. (2007)          |
|              | Double-peak canopy nitrogen index      | DCNI                | $(R_{720}-R_{700})/(R_{700}-R_{670})/(R_{720}-R_{670}+0.03)$                                            | Chen et al. (2010)           |
|              | Angular insensitivity vegetation index | AIVI                | $AIVI=[R_{445}\times(R_{720}+R_{735})-R_{573}\times(R_{720}-R_{735})]/[R_{720}\times(R_{573}+R_{445})]$ | He et al. (2016)             |
| Plant stress | Health-index                           | HI_2013             | $(R_{534}-R_{698})/(R_{534}+R_{698})-0.5\times R_{704}$                                                 | Mahlein et al. (2013)        |
|              | Powdery mildew-index                   | PMI_2013            | $(R_{520}-R_{584})/(R_{520}+R_{584})+R_{724}$                                                           | Mahlein et al. (2013)        |
|              | Cercospora leaf spot-index             | CLSI_2013           | $(R_{698}-R_{570})/(R_{698}+R_{570})-R_{734}$                                                           | Mahlein et al. (2013)        |
|              | Sugar beet rust-index                  | SBRI_2013           | $(R_{570}-R_{513})/(R_{570}+R_{513})+0.5R_{704}$                                                        | Mahlein et al. (2013)        |
|              | Health-index                           | HI_2014             | $(R_{739}-R_{402})/(R_{739}+R_{402})-0.5R_{403}$                                                        | Huang et al. (2014)          |
|              | Powdery mildew-index                   | PMI_2014            | $(R_{515}-R_{698})/(R_{515}+R_{698})-0.5R_{738}$                                                        | Huang et al. (2014)          |
|              | Yellow rust-index                      | YRI_2014            | $(R_{730}-R_{419})/(R_{730}+R_{419})+0.5R_{736}$                                                        | Huang et al. (2014)          |
|              | Aphids_index                           | AI_2014             | $(R_{400}-R_{735})/(R_{400}+R_{735})+0.5R_{403}$                                                        | Huang et al. (2014)          |
|              | Plant Senescence Reflectance Index     | PSRI                | $(R_{680}-R_{500})/R_{750}$                                                                             | Merzlyak et al. (1999)       |
|              | Normalized Phaeo Phytinization Index   | NPQI                | $(R_{415}-R_{435})/(R_{415}+R_{435})$                                                                   | Penuelas et al. (1995)       |
|              | Reflectance Curvature Index            | CUR                 | $(R_{675}\times R_{690})/R_{683}^2$                                                                     | Zarco-Tejada et al. (2000)   |
|              | Ratio Powdery Mildew Index             | RPMI                | $RPMI=R_{744}/R_{762}-0.5R_{710}$                                                                       | He et al. (2020)             |
|              | Damage sensitive spectral index 1      | DSSI1               | $DSSI1=(R_{719}-R_{873}-R_{509}-R_{537})/(R_{719}-R_{873}+R_{509}-R_{537})$                             | Mirik et al. (2006)          |
|              | Damage sensitive                       | DSSI2               | $DSSI2=(R_{747}-R_{901}-R_{537}-$                                                                       |                              |

|       |                                                  |      |                                             |                           |
|-------|--------------------------------------------------|------|---------------------------------------------|---------------------------|
|       | spectral index 2<br>Nir shoulder region<br>index |      | $R_{572}/(R_{747}-R_{901}+R_{537}-R_{572})$ |                           |
|       |                                                  | NSRI | NSRI= $R_{890}/R_{780}$                     | Liu et al. (2014)         |
| Water | Water index                                      | WI   | $R_{900}/R_{970}$                           | Penuelas et al.<br>(1997) |

## References

- Bausch, W.C., & Duke, H.R. (1996). Remote sensing of plant nitrogen status in corn. *Transactions of the ASAE*, 39, 1869-1875.
- Blackburn, G.A. (1998a). Quantifying chlorophylls and carotenoids at leaf and canopy scales: An evaluation of some hyperspectral approaches. *Remote Sensing of Environment*, 66, 273-285.
- Blackburn, G.A. (1998b). Spectral indices for estimating photosynthetic pigment concentrations: A test using senescent tree leaves. *International Journal of Remote Sensing*, 19, 657-675.
- Blackburn, G.A. (1999). Relationships between spectral reflectance and pigment concentrations in stacks of deciduous broadleaves. *Remote Sensing of Environment*, 70, 224-237.
- Calderón, R., Navas-Cortés, J.A., Lucena, C., & Zarco-Tejada, P.J. (2013). High-resolution airborne hyperspectral and thermal imagery for early detection of Verticillium wilt of olive using fluorescence, temperature and narrow-band spectral indices. *Remote Sensing of Environment*, 139, 231-245.
- Carter, G.A. (1994). Ratios of leaf reflectances in narrow wavebands as indicators of plant stress. *International Journal of Remote Sensing*, 15, 697-703.
- Chappelle, E.W., Kim, M.S., & McMurtrey, J.E. (1992). Ratio analysis of reflectance spectra (RARS) - an algorithm for the remote estimation of the concentrations of chlorophyll-a, chlorophyll-b, and carotenoids in soybean leaves. *Remote Sensing of Environment*, 39, 239-247.
- Chen, P., Haboudane, D., Tremblay, N., Wang, J., Vigneault, P., & Li, B. (2010). New spectral indicator assessing the efficiency of crop nitrogen treatment in corn and

- wheat. *Remote Sensing of Environment*, 114, 1987-1997.
- Dash, J., & Curran, P.J. (2004). The MERIS terrestrial chlorophyll index. *International Journal of Remote Sensing*, 25, 5403-5413.
- Datt, B. (1998). Remote sensing of chlorophyll a, chlorophyll b, chlorophyll a+b, and total carotenoid content in eucalyptus leaves. *Remote Sensing of Environment*, 66, 111-121.
- Datt, B. (1999). A new reflectance index for remote sensing of chlorophyll content in higher plants: Tests using Eucalyptus leaves. *Journal of Plant Physiology*, 154, 30-36.
- Eitel, J.U.H., Long, D.S., Gessler, P.E., & Smith, A.M.S. (2007). Using in-situ measurements to evaluate the new RapidEye™ satellite series for prediction of wheat nitrogen status. *International Journal of Remote Sensing*, 28, 4183-4190.
- Féret, J.-B., François, C., Gitelson, A., Asner, G.P., Barry, K.M., Panigada, C., Richardson, A.D., & Jacquemoud, S. (2011). Optimizing spectral indices and chemometric analysis of leaf chemical properties using radiative transfer modeling. *Remote Sensing of Environment*, 115, 2742-2750.
- Gamon, J.A., Huemmrich, K.F., Wong, C.Y.S., Ensminger, I., Garrity, S., Hollinger, D.Y., Noormets, A., & Peñuelas, J. (2016). A remotely sensed pigment index reveals photosynthetic phenology in evergreen conifers. *Proceedings of the National Academy of Sciences*, 113, 13087-13092.
- Gamon, J.A., Penuelas, J., & Field, C.B. (1992). A Narrow-Waveband Spectral Index That Tracks Diurnal Changes in Photosynthetic Efficiency. *Remote Sensing of Environment*, 41, 35-44.
- Garrity, S.R., Bohrer, G., Maurer, K.D., Mueller, K.L., Vogel, C.S., & Curtis, P.S. (2011). A comparison of multiple phenology data sources for estimating seasonal transitions in deciduous forest carbon exchange. *Agricultural and Forest Meteorology*, 151, 1741-1752.
- Gitelson, A., & Merzlyak, M.N. (1994). Quantitative estimation of chlorophyll-a using reflectance spectra - experiments with autumn chestnut and maple leaves. *Journal of Photochemistry and Photobiology B-Biology*, 22, 247-252.

- Gitelson, A.A., Buschmann, C., & Lichtenthaler, H.K. (1999). The chlorophyll fluorescence ratio F-735/F-700 as an accurate measure of the chlorophyll content in plants. *Remote Sensing of Environment*, 69, 296-302.
- Gitelson, A.A., Keydan, G.P., & Merzlyak, M.N. (2006). Three-band model for noninvasive estimation of chlorophyll, carotenoids, and anthocyanin contents in higher plant leaves. *Geophysical Research Letters*, 33, 431-433.
- Gitelson, A.A., & Merzlyak, M.N. (1996). Signature analysis of leaf reflectance spectra: Algorithm development for remote sensing of chlorophyll. *Journal of Plant Physiology*, 148, 494-500.
- Gitelson, A.A., Merzlyak, M.N., & Chivkunova, O.B. (2001). Optical properties and nondestructive estimation of anthocyanin content in plant leaves. *Photochemistry and Photobiology*, 74, 38-45.
- Gitelson, A.A., Yacobi, Y.Z., Schalles, J.F., Rundquist, D.C., Han, L., Stark, R., & Etzion, D. (2000). Remote estimation of phytoplankton density in productive waters. *Ergebnisse der Limnologie*, 121-136.
- Gitelson, A.A., Zur, Y., Chivkunova, O.B., & Merzlyak, M.N. (2002). Assessing carotenoid content in plant leaves with reflectance spectroscopy. *Photochemistry and Photobiology*, 75, 272-281.
- Haboudane, D., Miller, J.R., Tremblay, N., Zarco-Tejada, P.J., & Dextraze, L. (2002). Integrated narrow-band vegetation indices for prediction of crop chlorophyll content for application to precision agriculture. *Remote Sensing of Environment*, 81, 416-426.
- Hansen, P.M., & Schjoerring, J.K. (2003). Reflectance measurement of canopy biomass and nitrogen status in wheat crops using normalized difference vegetation indices and partial least squares regression. *Remote Sensing of Environment*, 86, 542-553.
- He, L., Qi, S. L., Duan, J. Z., Guo, T. C., Feng, W., He, D. X. (2020). Monitoring of wheat powdery mildew disease severity using multiangle hyperspectral remote sensing. *IEEE Transactions on Geoscience and Remote Sensing*, 59, 979-990.
- He, L., Song, X., Feng, W., Guo, B., Zhang, Y., Wang, Y., Wang, C., & Guo, T. (2016). Improved remote sensing of leaf nitrogen concentration in winter wheat using

- multi-angular hyperspectral data. *Remote Sensing of Environment*, 174, 122-133.
- Hernandez-Clemente, R., Navarro-Cerrillo, R.M., Suarez, L., Morales, F., & Zarco-Tejada, P.J. (2011). Assessing structural effects on PRI for stress detection in conifer forests. *Remote Sensing of Environment*, 115, 2360-2375.
- Huang, W., Guan, Q., Luo, J., & Zhang, J. (2014). New Optimized Spectral Indices for Identifying and Monitoring Winter Wheat Diseases. *IEEE Journal of Selected Topics in Applied Earth Observations & Remote Sensing*, 7, 2516-2524.
- Lichtenthaler, H.K., Lang, M., Sowinska, M., Heisel, F., & Miehe, J.A. (1996). Detection of vegetation stress via a new high resolution fluorescence imaging system. *Journal of Plant Physiology*, 148, 599-612.
- Li, D., Chen, J. M., Zhang, X., Yan, Y., Zhu, J., Zheng, H., Zhou, K., Yao, X., Tian, Y., Zhu, Y., Cheng, T., & Cao, W. (2020). Improved estimation of leaf chlorophyll content of row crops from canopy reflectance spectra through minimizing canopy structural effects and optimizing off-noon observation time. *Remote Sensing of Environment*, 248, 111985.
- Liu, L., Huang, W., Pu, R., & Wang, J. (2014). Detection of internal leaf structure deterioration using a new spectral ratio index in the near-infrared shoulder region. *Journal of Integrative Agriculture*, 13, 760-769.
- Lu, S., Lu, F., You, W.Q., Wang, Z.Y., Liu, Y., & Omasa, K. (2018). A robust vegetation index for remotely assessing chlorophyll content of dorsiventral leaves across several species in different seasons. *Plant Methods*, 14, 15.
- Maccioni, A., Agati, G., & Mazzinghi, P. (2001). New vegetation indices for remote measurement of chlorophylls based on leaf directional reflectance spectra. *Journal of Photochemistry and Photobiology B-Biology*, 61, 52-61.
- Mahlein, A.K., Rumpf, T., Welke, P., Dehne, H.W., Plümer, L., Steiner, U., & Oerke, E.C. (2013). Development of spectral indices for detecting and identifying plant diseases. *Remote Sensing of Environment*, 128, 21-30.
- Merzlyak, M.N., Gitelson, A.A., Chivkunova, O.B., & Rakitin, V.Y. (1999). Non-destructive optical detection of pigment changes during leaf senescence and fruit ripening. *Physiologia Plantarum*, 106, 135-141.



- Mirik, M., Michels, G.J., Kassymzhanova-Mirik, S., Elliott, N.C., Catana, V., Jones, D.B., Bowling, R. (2006). Using digital image analysis and spectral reflectance data to quantify damage by greenbug (Hemiptera: Aphididae) in winter wheat. *Computers and Electronics in Agriculture*, 2006, 51, 86-98.
- Penuelas, J., Baret, F., & Filella, I. (1995). Semiempirical indexes to assess carotenoids chlorophyll-a ratio from leaf spectral reflectance. *Photosynthetica*, 31, 221-230
- Penuelas, J., Pinol, J., Ogaya, R., & Filella, I. (1997). Estimation of plant water concentration by the reflectance water index WI (R900/R970). *International Journal of Remote Sensing*, 18, 2869-2875.
- Reyniers, M., Walvoort, D.J.J., & Baardemaaker J. D. (2006). A linear model to predict with a multi-spectral radiometer the amount of nitrogen in winter wheat. *International Journal of Remote Sensing*, 27, 4159-4179.
- Sims, D.A., & Gamon, J.A. (2002). Relationships between leaf pigment content and spectral reflectance across a wide range of species, leaf structures and developmental stages. *Remote Sensing of Environment*, 81, 337-354.
- Vogelmann, J.E., Rock, B.N., & Moss, D.M. (1993). Red edge spectral measurements from sugar maple leaves. *International Journal of Remote Sensing*, 14, 1563-1575
- Xue, L., Cao, W., Luo, W., Dai, T., & Zhu, Y. (2004). Monitoring leaf nitrogen status in rice with canopy spectral reflectance. *Agronomy Journal*, 96, 135-142.
- Zarco-Tejada, P.J., Berjon, A., Lopez-Lozano, R., Miller, J.R., Martin, P., Cachorro, V., Gonzalez, M.R., & de Frutos, A. (2005). Assessing vineyard condition with hyperspectral indices: Leaf and canopy reflectance simulation in a row-structured discontinuous canopy. *Remote Sensing of Environment*, 99, 271-287.
- Zarco-Tejada, P.J., Camino, C., Beck, P.S.A., Calderon, R., Hornero, A., Hernandez-Clemente, R., Kattenborn, T., Montes-Borrego, M., Susca, L., Morelli, M., Gonzalez-Dugo, V., North, P.R.J., Landa, B.B., Boscia, D., Saponari, M., & Navas-Cortes, J.A. (2018). Previsual symptoms of *Xylella fastidiosa* infection revealed in spectral plant-trait alterations. *Nat Plants*, 4, 432-439.
- Zarco-Tejada, P.J., Gonzalez-Dugo, V., & Berni, J.A.J. (2012). Fluorescence, temperature and narrow-band indices acquired from a UAV platform for water

stress detection using a micro-hyperspectral imager and a thermal camera. *Remote Sensing of Environment*, 117, 322-337.

Zarco-Tejada, P.J., Miller, J.R., Mohammed, G.H., Noland, T.L., & Sampson, P.H. (2000). Chlorophyll fluorescence effects on vegetation apparent reflectance: II. Laboratory and airborne canopy-level measurements with hyperspectral data. *Remote Sensing of Environment*, 74, 596-608.

Zhu, Y., Yao, X., Tian, Y., Liu, X., & Cao, W. (2008). Analysis of common canopy vegetation indices for indicating leaf nitrogen accumulations in wheat and rice. *International Journal of Applied Earth Observation and Geoinformation*, 10, 1-10.
